# Supplementary material
Source: publisher site journal article supplement (https://www.dovepress.com/article/489522)
Supplement: Supplementary file 1 [file get_supplementary_file.php]

**SUPPLEMENT MATERIAL**

**Table A Category system for qualitative content analysis**

| **Main Categories** | **Subcategories**  *(For each dimension, one category was assigned for each text segment)* | |
| --- | --- | --- |
| **PE activities** | *Dimension 1:*  *Level of patient engagement1* | *Dimension 2:*  *Type of healthcare organization* |
|  | 1. Consultation 2. Dialog 3. Partnership and shared Leadership 4. Other | Hospital  Out-patient organization  Other |
| **Facilitators** | *Dimension 1:*  *Level of patient involvement1* | *Dimension 2:*  *Relates to…* |
|  | 1. Consultation 2. Dialog 3. Partnership and shared Leadership 4. Other | 1. Patients 2. Staff 3. Healthcare organization 4. Other |
| **Barriers** | *Dimension 1:*  *Level of patient involvementa* | *Dimension 2:*  *Relates to…* |
|  | 1. Consultation 2. Dialog 3. Partnership and shared Leadership 4. Other | 1. Patients 2. Staff 3. Healthcare organization 4. Other |

**Notes:** aBased on Carman et al., 2013

**Reference**: Carman KL, Dardess P, Maurer M, et al. Patient and family engagement: a framework for understanding the elements and developing interventions and policies. Health Aff (Millwood) 2013;32(2):223–31.
